# Supplementary material
Source: MDPI journal article supplement (https://www.mdpi.com/search?q=sensors-19-04548)
Supplement: s001 [file sensors-19-04548-s001.pdf]

Supplementary Material

# CdTe Quantum Dots Modified with Cysteamine: A New Efficient Nanosensor for the Determination of Folic Acid

Doris E. Ramírez-Herrera <sup>1</sup>, Ana Patricia Reyes-Cruzaley <sup>1</sup>, Giselle Dominguez <sup>2</sup>, Francisco Paraguay-Delgado <sup>3</sup>, Antonio Tirado-Guizar <sup>1</sup> and Georgina Pina-Luis <sup>1,\*</sup>

<sup>1</sup> Tecnológico Nacional de México/Instituto Tecnológico de Tijuana, Centro de Graduados e Investigación, A.P. 1166, Tijuana 22500, Mexico; doris\_e\_777@hotmail.com (D.E.R.-H.); ana.reyes@tectijuana.edu.mx (A.P.R.-C.); guizarantonio@gmail.com (A.T.-G.)

<sup>2</sup> Miami Dade College, North Campus, 11380 NW 27th Ave, Miami, FL 33167, USA; gdomingu@mdc.edu

<sup>3</sup> Centro de Investigación en Materiales Avanzados S. C., Departamento de Física de Materiales, Av. Miguel de Cervantes 120, Complejo Industrial Chihuahua, Chihuahua CP 31136, Mexico; francisco.paraguay@cimav.edu.mx

\* Correspondence: gpinaluis@yahoo.com or gpinaluis@tectijuana.mx

Received: 13 September 2019; Accepted: 15 October 2019; Published: date

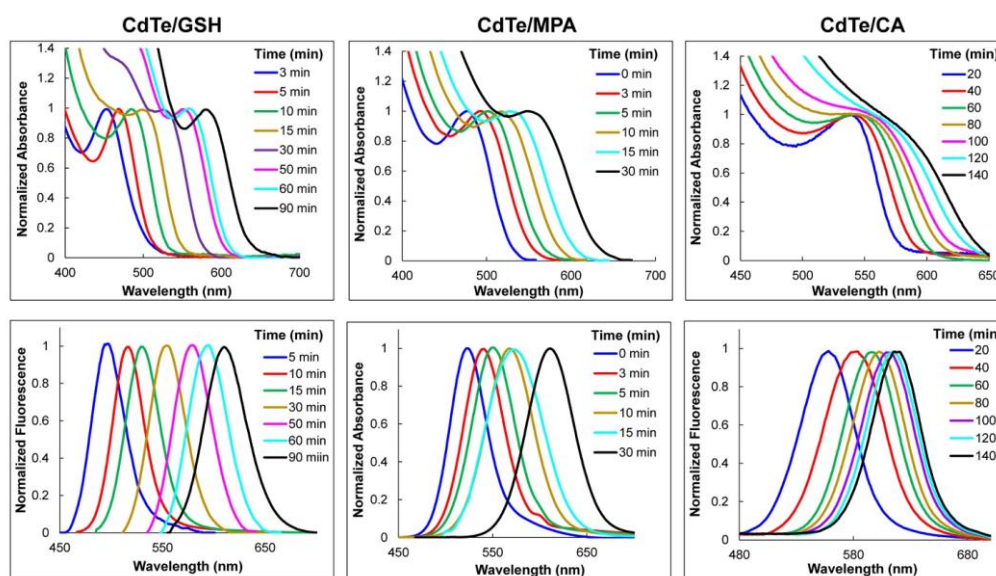

**Figure S1.** Evolution of absorption and fluorescence spectra of CdTe/GSH, CdTe/MPA and CdTe/CA QDs at different reaction times.

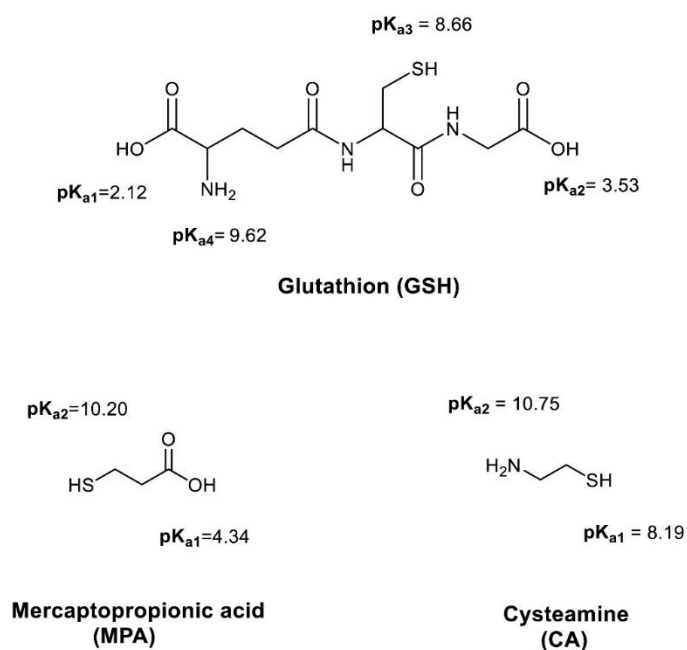

**Figure S2.** Structures and pKa values of thiolated ligands (GSH, MPA and CA).

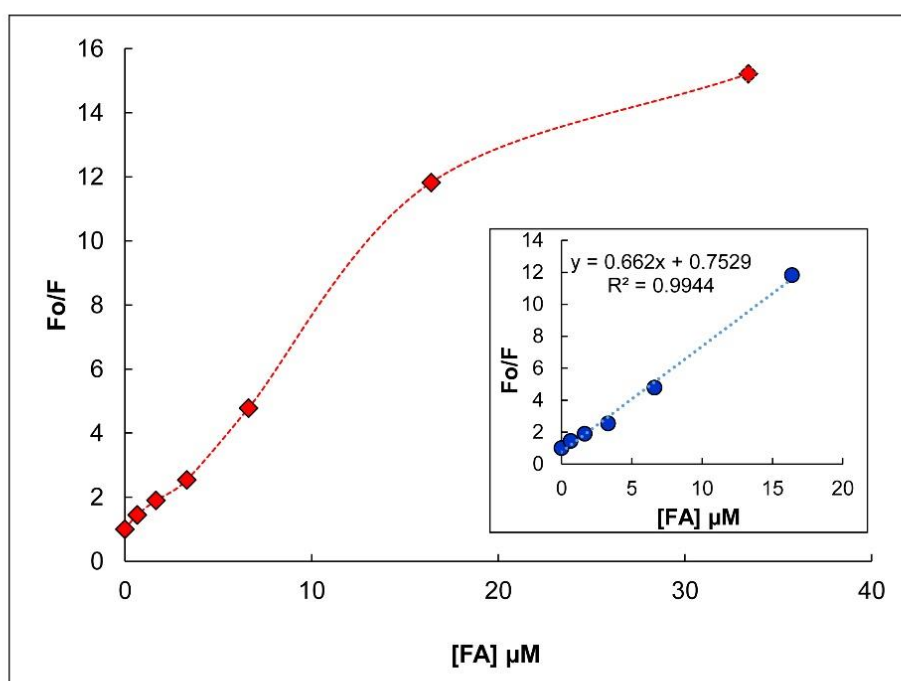

**Figure S3.** Stern-Volmer plot of the CdTe QDs-CA towards FA at 597 nm in PBS buffer (pH= 8).

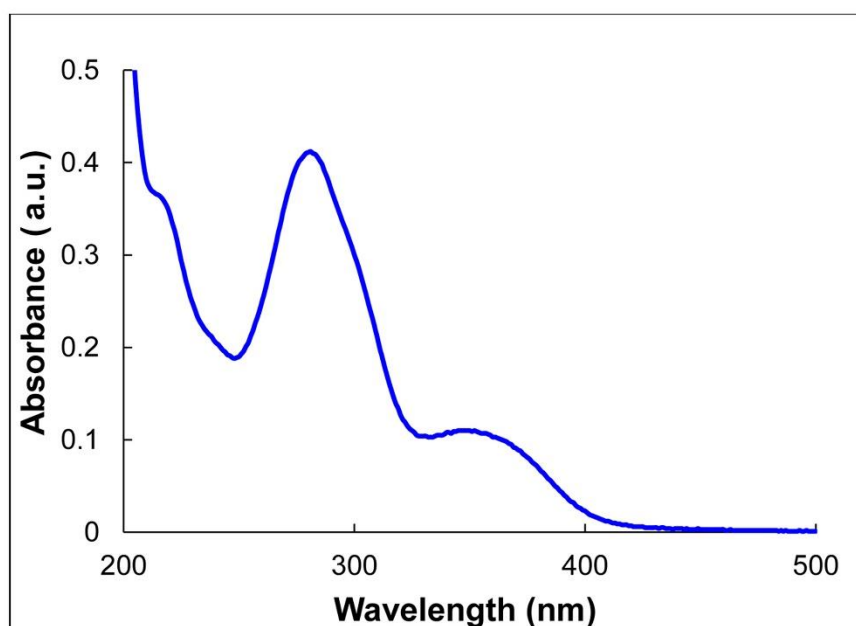

Figure S4. The UV-visible absorption spectrum of FA.

Table S1. Optical properties of CdTe QDs coated with MPA, GSH and CA.

| Ligand | Reaction Time (min) | $\lambda_{\text{ABS}}$ (nm) | Diameter (nm)* | Molar Absortivity $\epsilon$ (Lmol <sup>-1</sup> cm <sup>-1</sup> ) | $\lambda_{\text{EM}}$ (nm) |
|--------|---------------------|-----------------------------|----------------|---------------------------------------------------------------------|----------------------------|
| GSH    | 5                   | 469                         | 1.22           | 15414.6                                                             | 498                        |
|        | 10                  | 485                         | 1.87           | 37902.7                                                             | 516                        |
|        | 15                  | 499                         | 2.32           | 59573.2                                                             | 530                        |
|        | 30                  | 525                         | 2.90           | 95877.8                                                             | 555                        |
|        | 50                  | 544                         | 3.17           | 116216.9                                                            | 581                        |
|        | 60                  | 550                         | 3.24           | 121562.7                                                            | 595                        |
|        | 90                  | 580                         | 3.50           | 143371.7                                                            | 610                        |
| MPA    | 3                   | 477                         | 1.57           | 26039.07                                                            | 541                        |
|        | 5                   | 493                         | 2.13           | 49891.69                                                            | 552                        |
|        | 10                  | 502                         | 2.40           | 64147.4                                                             | 568                        |
|        | 15                  | 527                         | 2.93           | 98280.2                                                             | 572                        |
|        | 30                  | 547                         | 3.21           | 118947.8                                                            | 611                        |
|        | 20                  | 539                         | 3.11           | 111389.8                                                            | 558                        |
|        | 40                  | 542                         | 3.15           | 114328.5                                                            | 584                        |
| CA     | 60                  | 545                         | 3.19           | 117140.5                                                            | 597                        |
|        | 80                  | 550                         | 3.24           | 121562.7                                                            | 603                        |
|        | 100                 | 555                         | 3.29           | 125684.4                                                            | 609                        |
|        | 120                 | 558                         | 3.32           | 128029.8                                                            | 614                        |
|        | 140                 | 564                         | 3.38           | 132478.8                                                            | 620                        |

\* Calculated using Peng regression [1]

## Procedures

### a) Preparation and characterization of thiol-capped CdTe QDs

QDs modified by GSH and MPA were synthesized according to a methodology used in previous works of the group [2]. Briefly, 0.4 mmol of thiolated ligand (GSH or MPA) and 0.4 mmol of  $\text{CdCl}_2 \cdot 2.5\text{H}_2\text{O}$  were dissolved in 100 mL of deionized water in a three-necked flask. The mixture is subjected to magnetic stirring and the pH is adjusted to 10 using 1M NaOH solution. After 5 min of vigorous stirring, a mixture formed by 0.08 mmol of  $\text{K}_2\text{TeO}_3$  and 4.2 mmol of  $\text{NaBH}_4$  in 100 mL of ionized water, is added into the three-necked flask in agitation. After another 5 min stirring, a condenser is attached to the flask and the mixture is refluxed at 100 °C. Aliquots were taken at different reaction times to obtain QDs of different sizes. Molar relation Cd/Te/LT/ $\text{NaBH}_4$  was 1/0.2/1/10. The synthesis procedure of CdTe/CA QDs is similar, except that the pH value of Cd precursor solutions was adjusted to 5.6. The thiol-capped QDs solutions were concentrated and purified by ethanol precipitation and collected via centrifugation.

#### b) Determination of quantum yields ( $\Phi_x$ )

The fluorescence quantum yields (QY) of the QDs were obtained by a methodology used in a previous article [2] by comparison with a fluorescence reference standard of fluorescein with a QY of 79% in 0.1 M NaOH using the equation:

$$\phi_{QD} = \phi_{FL} \left( \frac{Grad_{QD}}{Grad_{FL}} \right) \left( \frac{n_{QD}^2}{n_{FL}^2} \right) \quad (1)$$

where the subscripts FL and QD denote fluorescein and QD respectively,  $\phi$  is the fluorescence quantum yield, Grad the gradient from the plot of integrated fluorescence intensity vs absorbance, and  $n$  the refractive index of the solvent.

QYs of CdTe/CA, CdTe/GSH and CdTe/MPA QDs of similar size (around 3.2 nm) were determined to be 30, 41 and 49 respectively.

#### c) Calculation of binding constant between QDs/CA and FA

The binding constant ( $K$ ) between QD/CA and FA was determined using a modification of the Stern Volmer equation: [3]

$$\frac{1}{F_0 - F} = \frac{1}{F_0} + \frac{1}{KF_0[Q]}$$

where  $K$  is the binding constant of the electrostatic conjugate,  $Q$  is the concentration of FA,  $F_0$  and  $F$  are the fluorescence intensity in the absence and in the presence of FA respectively. The binding constant calculated was  $K = 5.2 \times 10^5 \text{ M}^{-1}$

## References

1. Yu, W.W.; Qu, L.H.; Guo, W.Z.; Peng, X.G. Experimental determination of the extinction coefficient of CdTe, CdSe and CdS nanocrystals. *Chem Mater* 2003, 15, 2854-2860.
2. Ramírez-Herrera, D. E.; Tirado-Guizar, A.; Paraguay-Delgado, F.; Pina-Luis, G. Ratiometric arginine assay based on FRET between CdTe quantum dots and Cresyl violet. *Microchim. Acta*, 2017, 184, 1997-2005.
3. Shen, X-C.; Liou, X-Y.; Ye, L-P.; Liang, H.; Wang, Z-Y. Spectroscopic studies on the interaction between human hemoglobin and CdS quantum dots. *J. Colloid Interf. Sci.* 2007, 311, 400-406.
